# Supplementary material for: Serological and Molecular Epidemiology of Chikungunya Virus Infection in Vietnam, 2017–2019
Source: MDPI journal article supplement (doi:10.3390/v15102065), 2023-10-08
Supplement: s1 [file s1]

*Article research*

**Serological and molecular epidemiology of Chikungunya virus infection in  
Vietnam, 2017 – 2019**

**SUPPLEMENTARY INFORMATION**

**Table S1: Sample distribution in the provinces of Vietnam.**

| Num        | Region | Provinces        | 2017<br>n (%++) | 2018<br>n (%++) | 2019<br>n (%++) | Total samples<br>n (%+) |
|------------|--------|------------------|-----------------|-----------------|-----------------|-------------------------|
| 1          | North  | Ha Nam           | 115 (100)       | (0)             | (0)             | 115 (10.8)              |
| 2          |        | Ha Noi           | (0)             | (0)             | 86 (100)        | 86 (8.1)                |
| 3          |        | Hai Duong        | 73 (98.6)       | (0)             | 1 (1.4)         | 74 (7.0)                |
| 4          |        | Hung Yen         | (0)             | (0)             | 2 (100)         | 2 (0.2)                 |
| 5          |        | Bac Ninh         | (0)             | (0)             | 1 (100)         | 1 (0.1)                 |
| 6          |        | Hai Phong        | (0)             | (0)             | 1 (100)         | 1 (0.1)                 |
| 7          |        | Hoa Binh         | (0)             | (0)             | 1 (100)         | 1 (0.1)                 |
| 8          |        | Son La           | (0)             | (0)             | 1 (100)         | 1 (0.1)                 |
| 9          |        | Thai Nguyen      | (0)             | 1 (100)         | (0)             | 1 (0.1)                 |
| 10         |        | Thanh Hoa        | (0)             | 1 (100)         | (0)             | 1 (0.1)                 |
| 11         | South  | An Giang         | 4 (3.3)         | 69 (56.6)       | 49 (40.2)       | 122 (11.5)              |
| 12         |        | Dong Thap        | 32 (39)         | 12 (14.6)       | 38 (46.3)       | 82 (7.7)                |
| 13         |        | Dong Nai         | (0)             | 40 (54.1)       | 34 (45.9)       | 74 (7.0)                |
| 14         |        | Vung Tau         | 36 (52.9)       | 30 (44.1)       | 2 (2.9)         | 68 (6.4)                |
| 15         |        | Can Tho          | 18 (29.5)       | 42 (68.9)       | 1 (1.6)         | 61 (5.7)                |
| 16         |        | Vinh Long        | 6 (10)          | 25 (41.7)       | 29 (48.3)       | 60 (5.6)                |
| 17         |        | Tay Ninh         | (0)             | 12 (26.7)       | 33 (73.3)       | 45 (4.2)                |
| 18         |        | Long An          | 13 (29.5)       | 17 (38.6)       | 14 (31.8)       | 44 (4.1)                |
| 19         |        | Ben Tre          | 1 (2.5)         | 1 (2.5)         | 38 (95)         | 40 (3.8)                |
| 20         |        | Lam Dong         | 11 (39.3)       | 14 (50)         | 3 (10.7)        | 28 (2.6)                |
| 21         |        | Soc Trang        | 11 (40.7)       | 7 (25.9)        | 9 (33.3)        | 27 (2.5)                |
| 22         |        | Ca Mau           | 17 (68)         | 7 (28)          | 1 (4)           | 25 (2.4)                |
| 23         |        | Hau Giang        | (0)             | 19 (82.6)       | 4 (17.4)        | 23 (2.2)                |
| 24         |        | Binh Phuoc       | 8 (42.1)        | (0)             | 11 (57.9)       | 19 (1.8)                |
| 25         |        | Binh Duong       | 6 (35.3)        | 8 (47.1)        | 3 (17.6)        | 17 (1.6)                |
| 26         |        | Kien Giang       | 8 (53.3)        | 7 (46.7)        | (0)             | 15 (1.4)                |
| 27         |        | Tien Giang       | 1 (9.1)         | 7 (63.6)        | 3 (27.3)        | 11 (1.0)                |
| 28         |        | Ho Chi Minh city | 5 (71.4)        | 1 (14.3)        | 1 (14.3)        | 7 (0.7)                 |
| 29         |        | Tra Vinh         | 3 (50)          | 3 (50)          | (0)             | 6 (0.6)                 |
| 30         |        | Bac Lieu         | (0)             | 3 (60)          | 2 (40)          | 5 (0.5)                 |
| 31         |        | Phu Yen          | (0)             | (0)             | 1 (100)         | 1 (0.1)                 |
| Total (%)* |        |                  | 368 (34.6)      | 326 (30.7)      | 369 (34.7)      | 1063 (100)              |

Table S1 shows the distribution of residence of patients who had serum samples collected for this study. The distribution is divided into provinces according to the two regions, North and South,

and by year. The table is arranged in decreasing order of the number of serum samples collected in each province, with the percentage of samples collected compared to the total of 1063 samples shown in brackets.

+ % in total for each variable.

++ % in each lane.

**Table S2: CHIKV primers used in this study.** Table S2 provides detailed information about the primer pairs used in this study. The table includes the following information for each primer pair: region of gene, genome position, and nucleotide sequence of the primers [40-42].

| Primer                                    | Region | Genome position | Sequence (5' → 3')        |
|-------------------------------------------|--------|-----------------|---------------------------|
| <b>Real-time RT-PCR</b>                   |        |                 |                           |
| Forward primer - P1F                      | E1     | 10364 - 10384   | CTCATACCGCATCCGCATCAG     |
| Reverse primer - P1R                      | E1     | 10470 - 10492   | ACATTGGCCCCACAATGAATTG    |
| Forward primer - P2F                      | NSP2   | 3171 - 3194     | GGCAGTGGTCCCAGATAATTCAAG  |
| Reverse primer - P2R                      | NSP2   | 3253 - 3277     | GCTGTCTAGATCCACCCCATACATG |
| <b>Conventional RT-PCR and Sequencing</b> |        |                 |                           |
| Forward primer - P3F                      | E1     | 10246 - 10263   | TACCCATTCATGTGGGGC        |
| Reverse primer - P3R                      | E1     | 10521 - 10539   | GCCTTTGTACACCACGATT       |

**Figure S1: Neutralization antibody titer in 4 age groups in the North (A) and in the South (B).**

The mean of neutralization antibody titer was compared between age groups using Kruskal-Wallis test, with Dunn-Bonferroni correction method for multiple comparison tests. *P* value was defined as follows \*  $p \leq 0.05$ ; \*\*  $p \leq 0.01$ ; \*\*\*\*  $p < 0.0001$ .

**A**

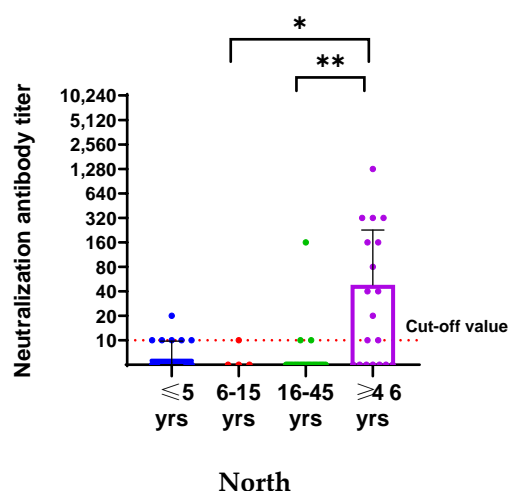

**B**

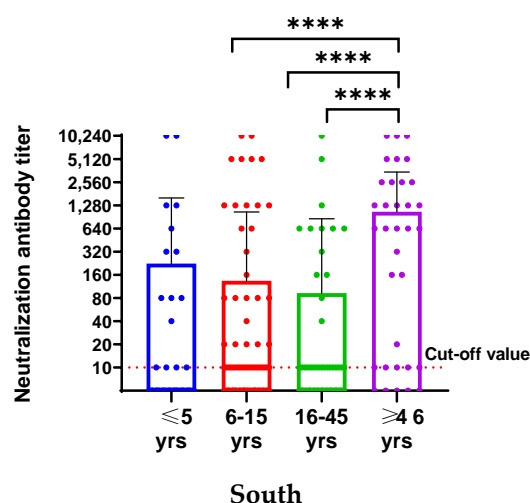

**Figure S2:** The rate of the anti-CHIKV IgG (A) and IgG (B) antibodies by age group in the study.

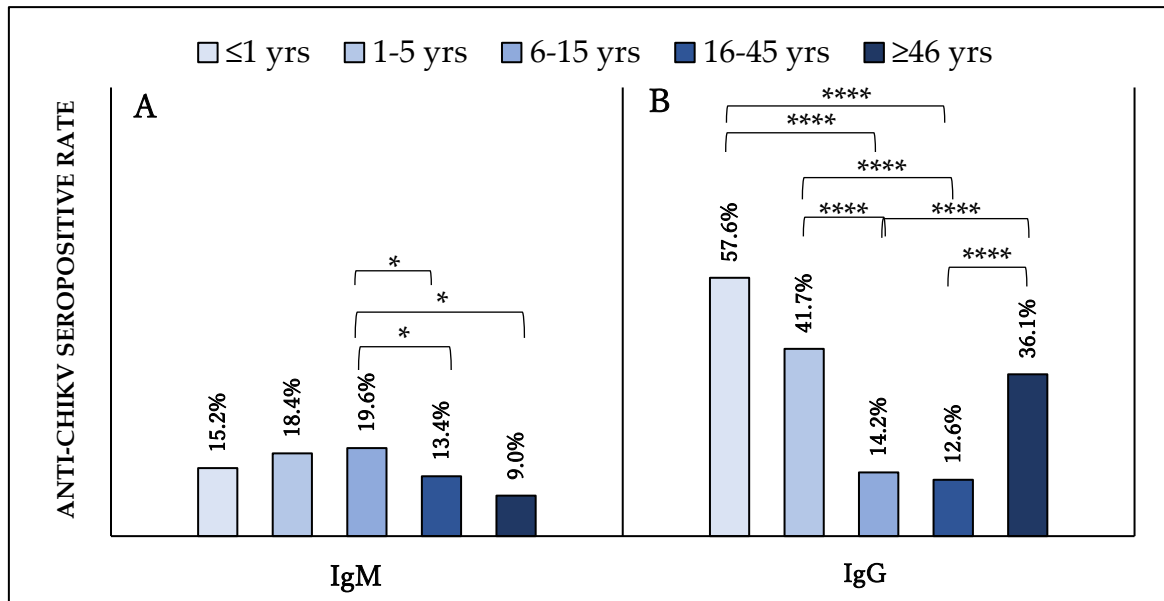

**Figure S2** shows the distribution of IgM (A) and IgG (B) antibodies in different age groups. The color scheme of light blue to dark blue indicates the following age groups: under 1 year old, 1- to 5-year-olds, 6- to 15-year-olds, 16- to 45-year-olds, and over 46-year-olds. IgM and IgG rate between age groups were compared using the Generalized Linear Model (GLM). P value was defined as follows \*  $p \leq 0.05$ ; and \*\*\*\*  $p < 0.0001$ .

**Figure S3:** Detection rates of IgM and RNA in the Northern and Southern regions from 2017 to 2019

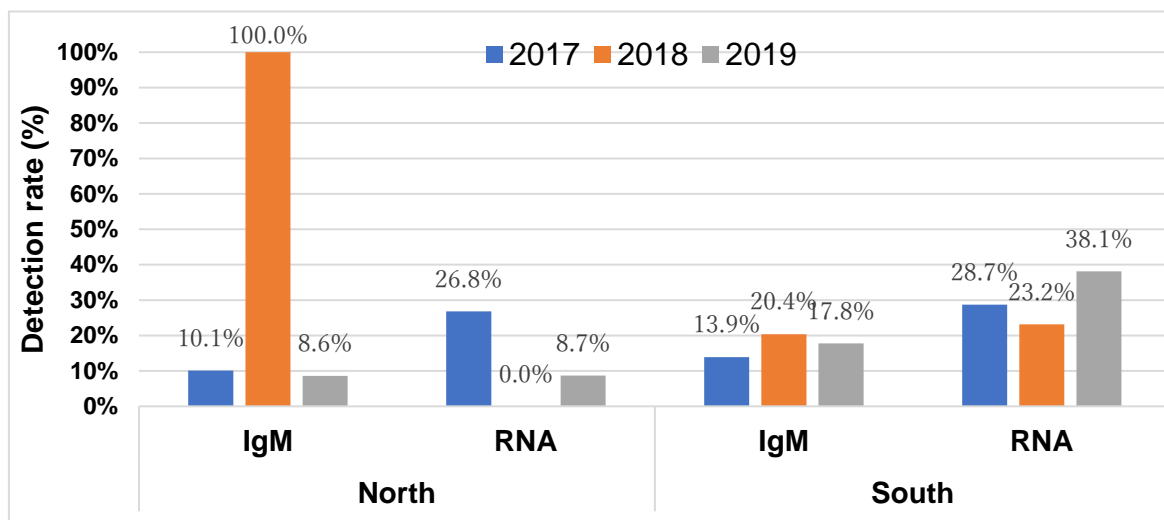

**Figure S3** shows the detection rates of IgM and RNA in the Northern and Southern regions over the years 2017 (blue), 2018 (orange), and 2019 (gray). The Generalized Linear Model (GLM) was used to compare detection rates between years in each region. The results showed that there was no statistically significant difference in detection rates between years in either region ( $p > 0.05$ ).
